# Supplementary material
Source: PubMed Central journal article supplement (PMC1829279)

**System A**  
Apolar  
Lipids

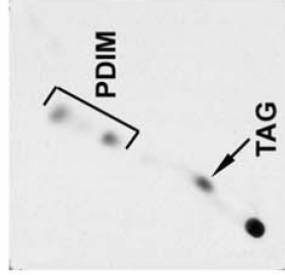

**System B**  
Apolar  
Lipids

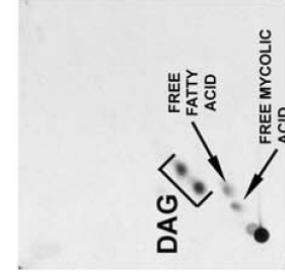

**System C**  
Apolar  
Lipids

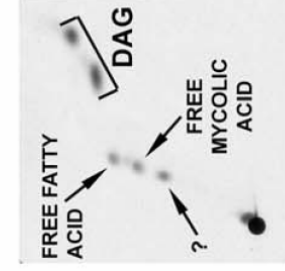

**System D**  
Apolar  
Lipids

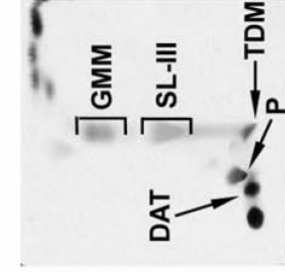

**System D**  
Polar  
Lipids

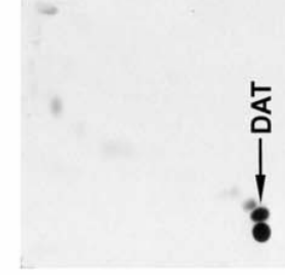

**System E**  
Polar  
Lipids

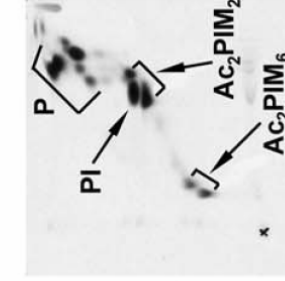

WT

*ΔkasB*

*ΔkasB*  
pMV261*kasB*

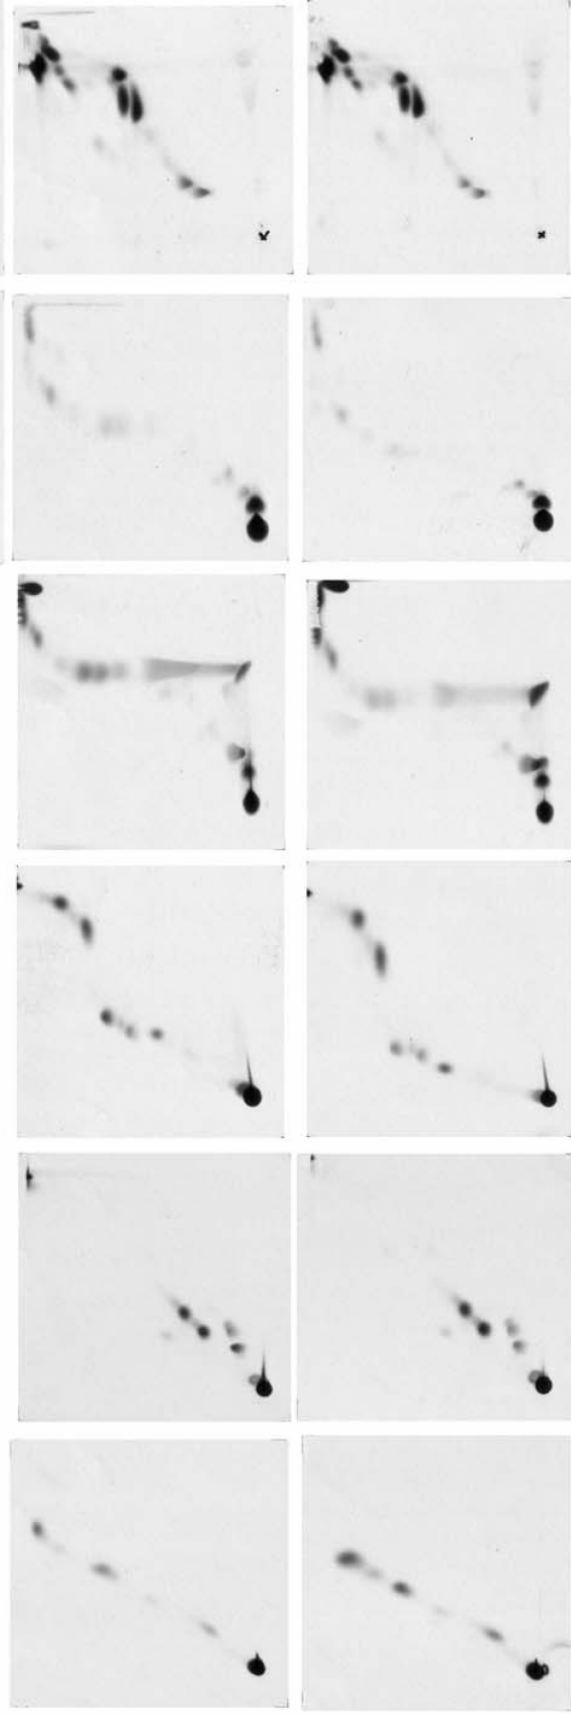

Supplement: pnas_0608654104_2.pdf [file pnas_0608654104_2.pdf]
