# Supplementary material
Source: PubMed Central journal article supplement (PMC1829279)
Supplement: pnas_0608654104_10.pdf [file pnas_0608654104_10.pdf]

**Table 1.** Major species of mycolic acids in CDC1551 WT,  $\Delta kasB$ , and complemented strains (indicated as Na-adducts; masses of the most abundant species are highlighted).

| MA                         | Strain                                 | Total carbon number of mycolic acid |      |             |      |             |      |             |             |             |             |      |             |             |      |      |      |      |      |      |
|----------------------------|----------------------------------------|-------------------------------------|------|-------------|------|-------------|------|-------------|-------------|-------------|-------------|------|-------------|-------------|------|------|------|------|------|------|
|                            |                                        | 76:2                                | 77:2 | 78:2        | 79:2 | 80:2        | 81:2 | 82:2        | 83:2        | 84:2        | 85:2        | 86:2 | 87:2        | 88:2        | 89:2 |      |      |      |      |      |
| <b><math>\alpha</math></b> | WT                                     | 1146                                |      | <b>1174</b> |      | <b>1202</b> |      | 1230        |             | 1258        |             |      |             |             |      |      |      |      |      |      |
|                            | $\Delta kasB$                          | 1146                                |      | <b>1174</b> |      | 1202        |      |             |             |             |             |      |             |             |      |      |      |      |      |      |
|                            | $\Delta kasB$<br>(pMV261 <i>kasB</i> ) |                                     |      | 1174        |      | 1202        |      | 1230        |             | <b>1258</b> |             | 1286 |             | 1314        |      |      |      |      |      |      |
| MA                         | Strain                                 | Total carbon number of mycolic acid |      |             |      |             |      |             |             |             |             |      |             |             |      |      |      |      |      |      |
|                            |                                        | 76:1                                | 77:1 | 78:1        | 79:1 | 80:1        | 81:1 | 82:1        | 83:1        | 84:1        | 85:1        | 86:1 | 87:1        | 88:1        | 89:1 | 90:1 | 91:1 | 92:1 | 93:1 | 94:1 |
| <b>M</b>                   | WT                                     |                                     |      |             | 1206 |             | 1234 |             | 1262        |             | <b>1290</b> | 1304 | 1318        | 1332        | 1346 | 1360 | 1374 | 1388 |      |      |
|                            | $\Delta kasB$                          |                                     |      |             | 1206 |             | 1234 |             | <b>1262</b> |             | 1290        | 1304 |             |             |      |      |      |      |      |      |
|                            | $\Delta kasB$<br>(pMV261 <i>kasB</i> ) |                                     |      |             |      |             |      |             | 1262        |             | <b>1290</b> | 1304 | 1318        | 1332        | 1346 | 1360 | 1374 | 1388 | 1402 | 1416 |
| <b>K</b>                   | WT                                     |                                     |      |             |      |             |      |             |             |             | 1274        | 1288 | 1302        | <b>1316</b> |      |      | 1344 |      |      |      |
|                            | $\Delta kasB$                          |                                     |      | 1190        |      | <b>1218</b> |      | <b>1246</b> |             |             |             |      |             |             |      |      |      |      |      |      |
|                            | $\Delta kasB$<br>(pMV261 <i>kasB</i> ) |                                     |      |             |      |             |      |             |             | 1274        | 1288        | 1302 | <b>1316</b> | 1330        | 1344 | 1358 | 1372 |      |      |      |
