# Supplementary material
Source: PubMed Central journal article supplement (PMC1829279)
Supplement: pnas_0608654104_11.pdf [file pnas_0608654104_11.pdf]

**Table 2.** Plasmids and phages used in this study.

| Description                            | Reference/Source                                                                                                                                             |                              |
|----------------------------------------|--------------------------------------------------------------------------------------------------------------------------------------------------------------|------------------------------|
| <b>Plasmids</b>                        |                                                                                                                                                              |                              |
| pCR <sup>®</sup> 2.1-TOPO <sup>®</sup> | PCR product cloning vector                                                                                                                                   | Invitrogen Life Technologies |
| pJSC347                                | Vector for cloning allelic exchange substrates to be used for specialized transduction. Contains $\lambda$ phage <i>cos</i> site and Hyg <sup>R</sup> marker | (1)                          |
| pYUB2417                               | Derivative of pJSC347 designed for allelic exchange of <i>M. tuberculosis kasB</i> .                                                                         | This work                    |
| pMV261 <i>kasA</i>                     | <i>M. tuberculosis kasA</i> cloned in pMV261, an <i>E. coli-mycobacteria</i> shuttle vector with the <i>hsp60</i> promoter                                   | (2)                          |
| pMV261 <i>kasB</i>                     | <i>M. tuberculosis kasB</i> cloned in pMV261, an <i>E. coli-mycobacteria</i> shuttle vector with the <i>hsp60</i> promoter                                   | (2)                          |
| <b>Phages</b>                          |                                                                                                                                                              |                              |
| phAE159                                | Conditionally replicating shuttle phasmid derived from the lytic mycobacteriophage TM4                                                                       | (3)                          |
| phAE404                                | Derivative of phAE159 obtained by cloning pYUB2417 in its unique <i>PacI</i> site                                                                            | This work                    |

- (1) Sambandamurthy, V. K., Wang, X., Chen, B., Russell, R. G., Derrick, S., Collins, F. M., Morris, S. L. & Jacobs, W. R., Jr. (2002) *Nat Med* 8, 1171-1174.
- (2) Kremer, L., Douglas, J. D., Baulard, A. R., Morehouse, C., Guy, M. R., Alland, D., Dover, L. G., Lakey, J. H., Jacobs, W. R., Jr., Brennan, P. J., Minnikin, D. E. & Besra, G. S. (2000) *J Biol Chem* 275, 16857-16864.
- (3) Kriakov, J. & Jacobs Jr., W.R. (Albert Einstein College of Medicine, NY), unpublished results.
