# Supplementary material
Source: PubMed Central journal article supplement (PMC1829279)

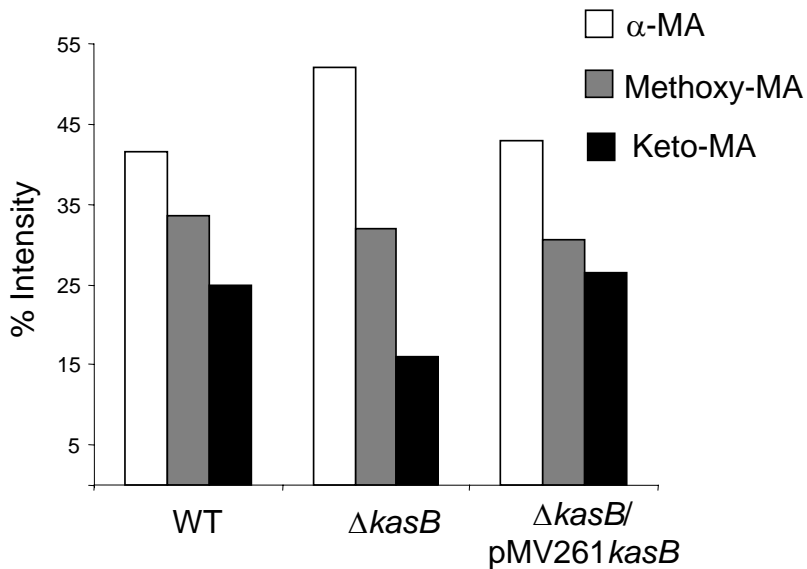

Supplement: pnas_0608654104_1.pdf [file pnas_0608654104_1.pdf]

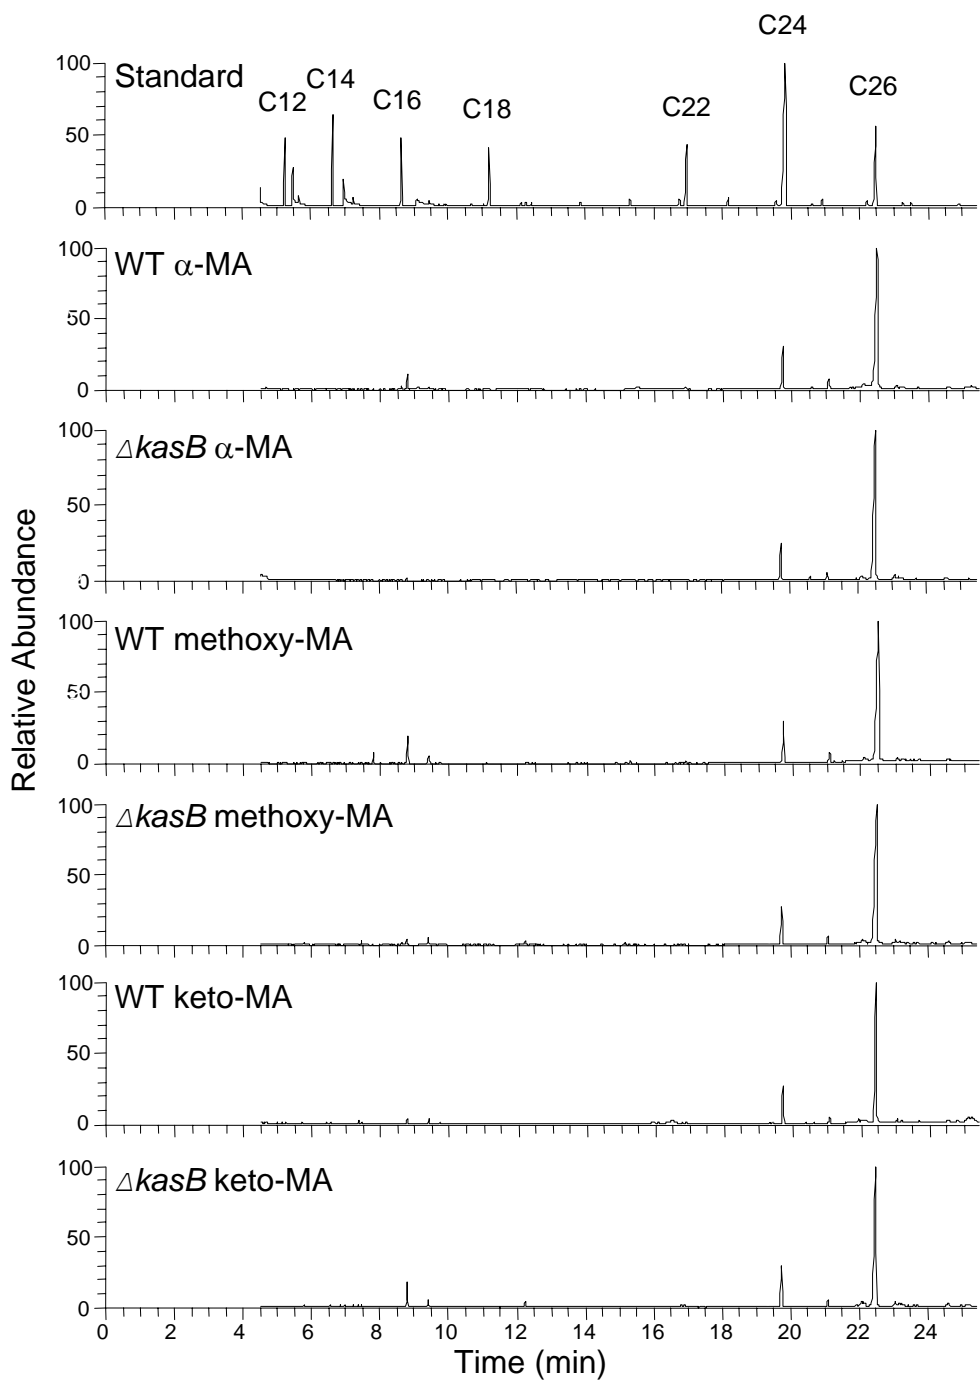

Supplement: pnas_0608654104_3.pdf [file pnas_0608654104_3.pdf]

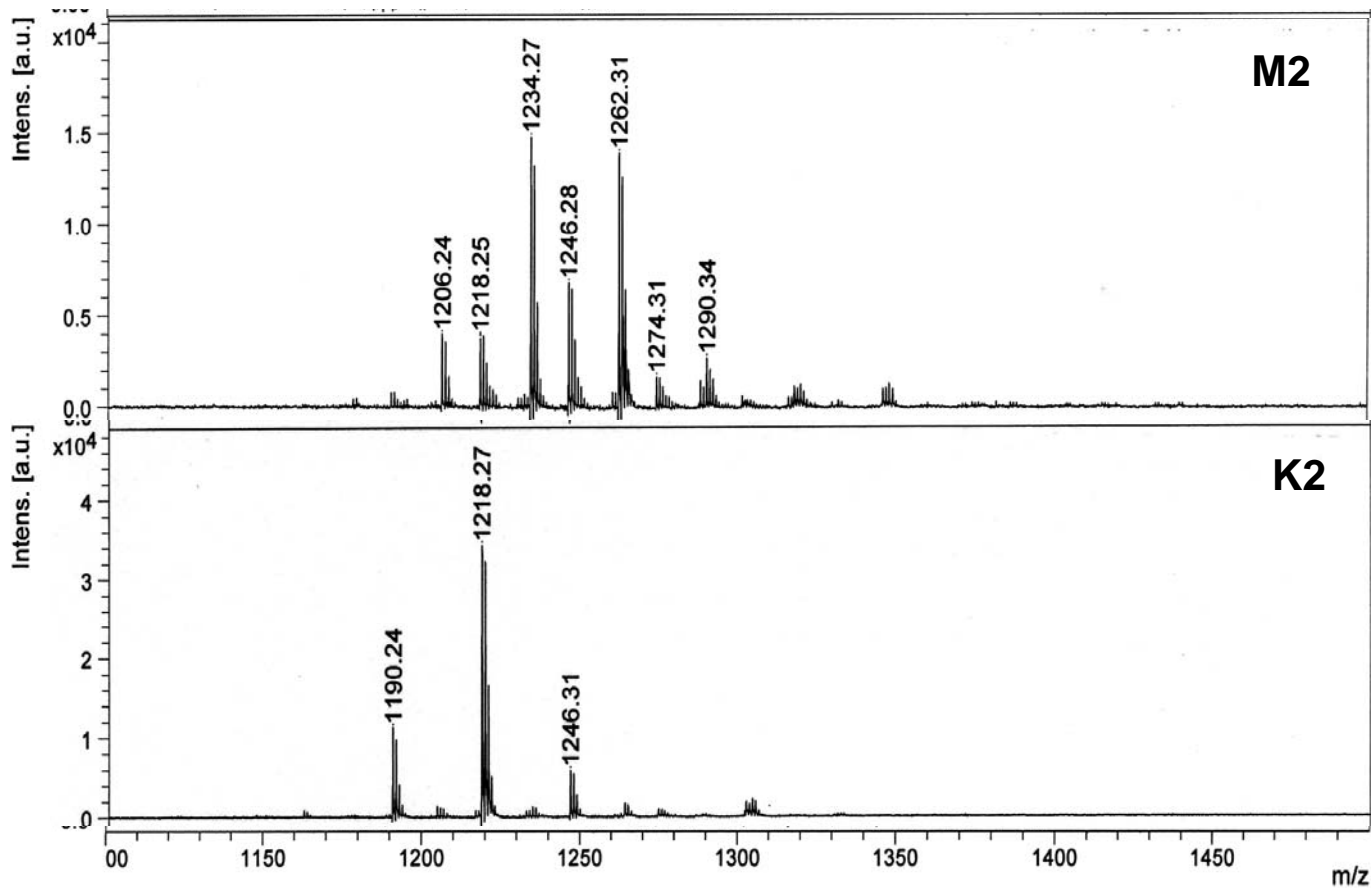

Supplement: pnas_0608654104_4.pdf [file pnas_0608654104_4.pdf]

**WT  $\alpha$ -MA**

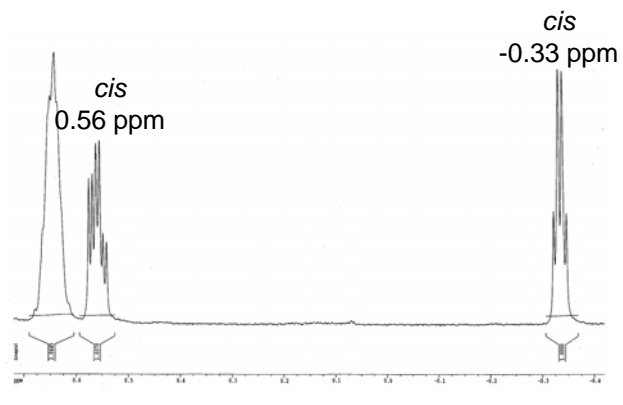

**$\Delta kasB$   $\alpha$ -MA**

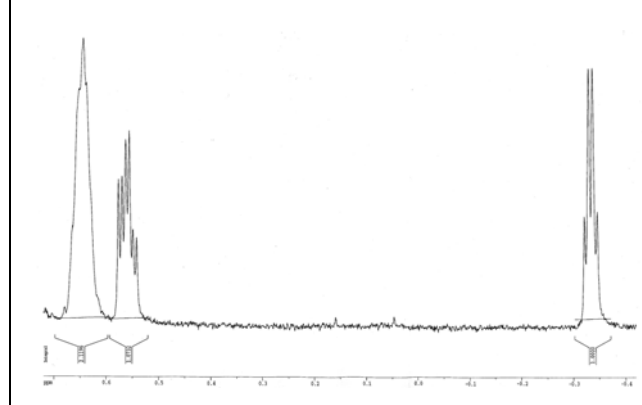

**WT methoxy-MA**

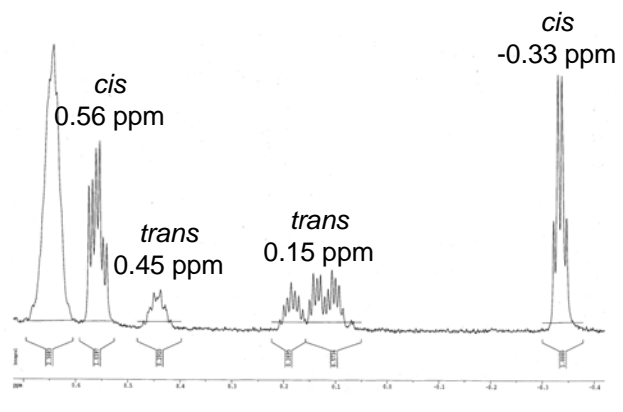

**$\Delta kasB$  methoxy-MA**

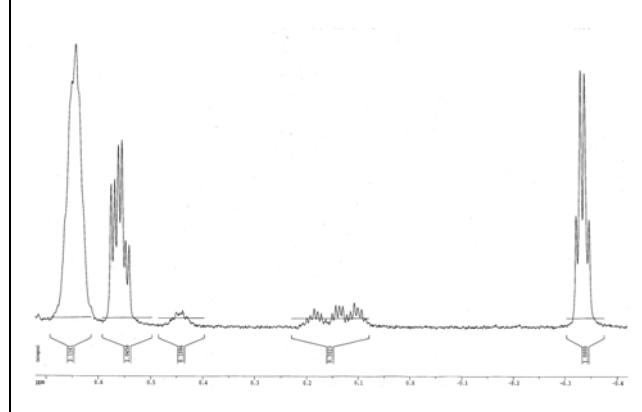

**WT keto-MA**

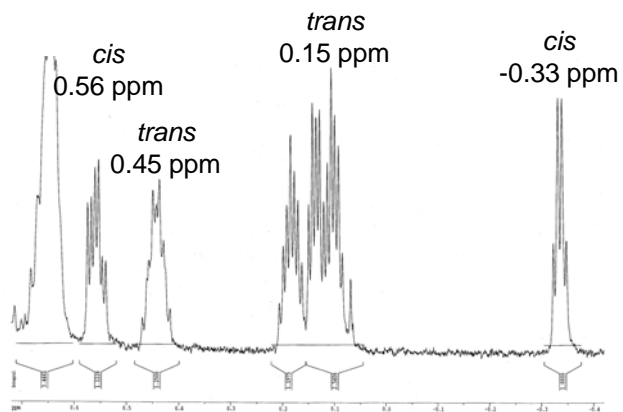

**$\Delta kasB$  keto-MA**

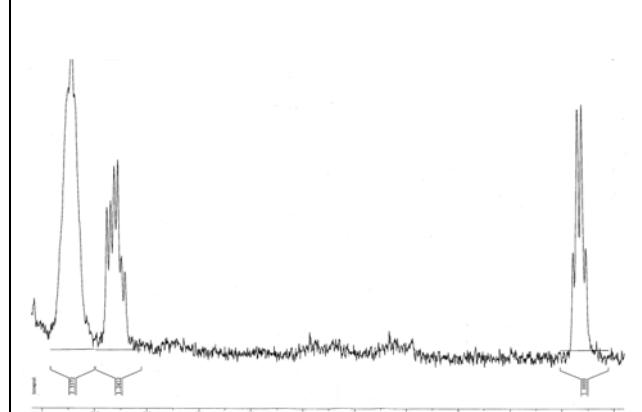

Supplement: pnas_0608654104_5.pdf [file pnas_0608654104_5.pdf]

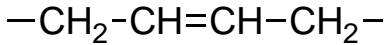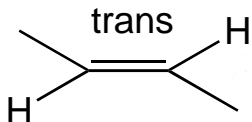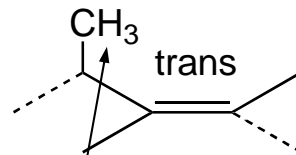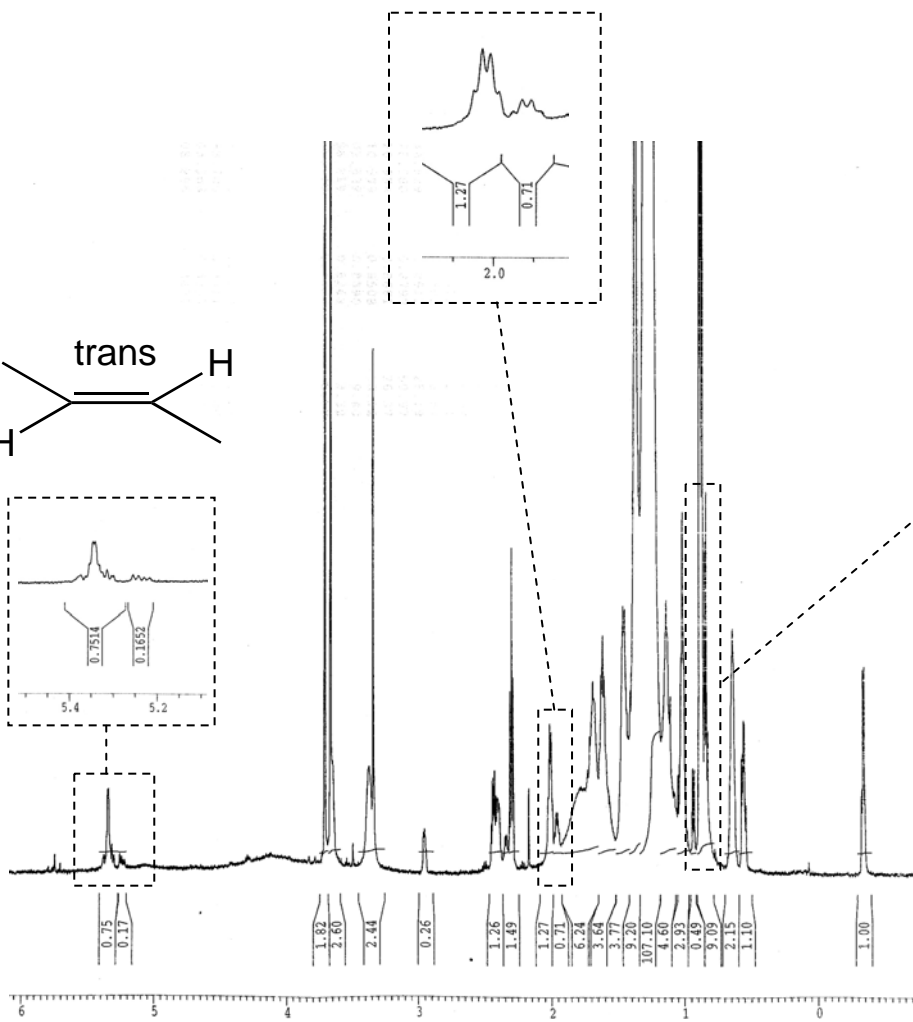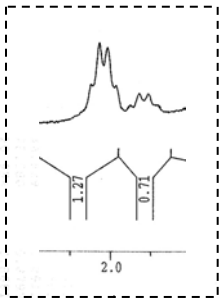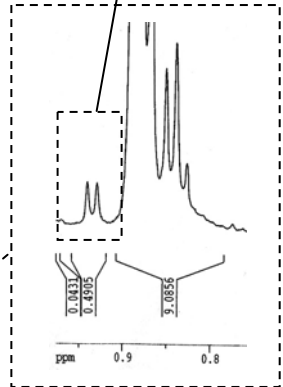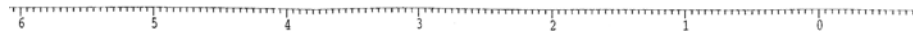

Supplement: pnas_0608654104_6.pdf [file pnas_0608654104_6.pdf]

WT

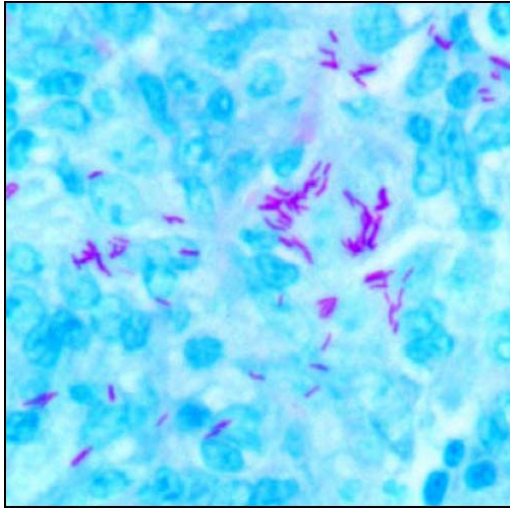

$\Delta kasB$

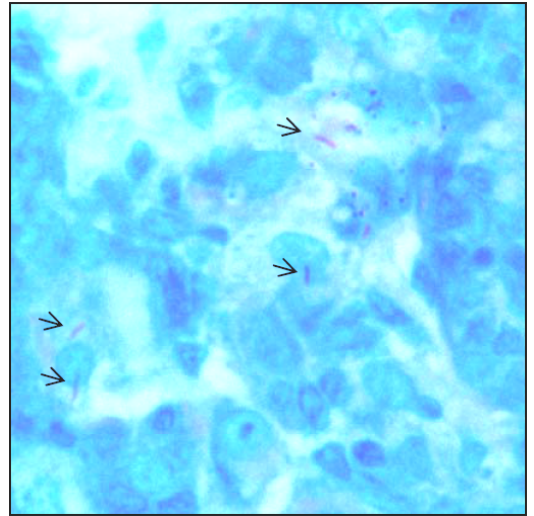

$\Delta kasB$  (pMV261 *kasB*)

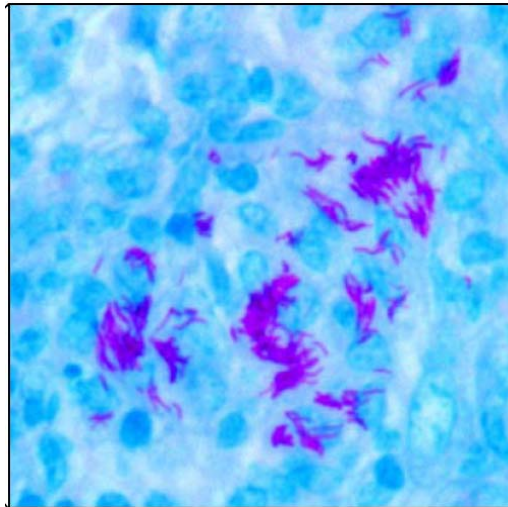

Supplement: pnas_0608654104_7.pdf [file pnas_0608654104_7.pdf]

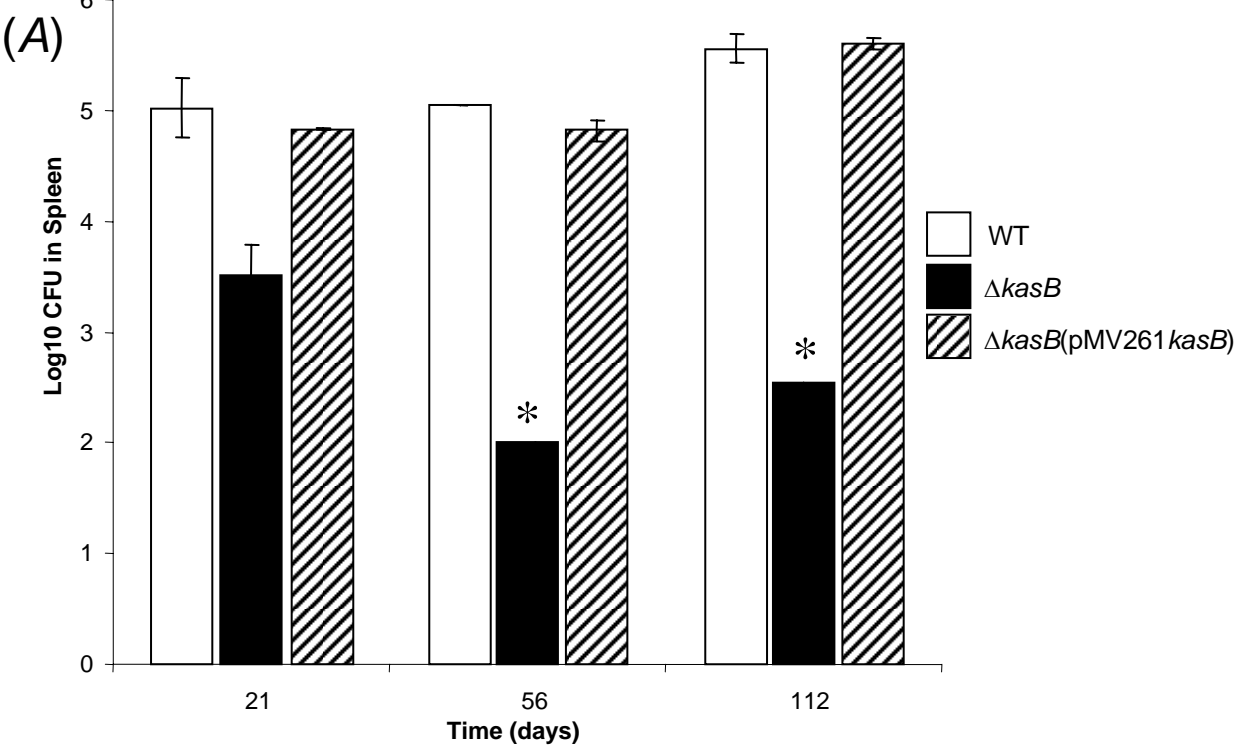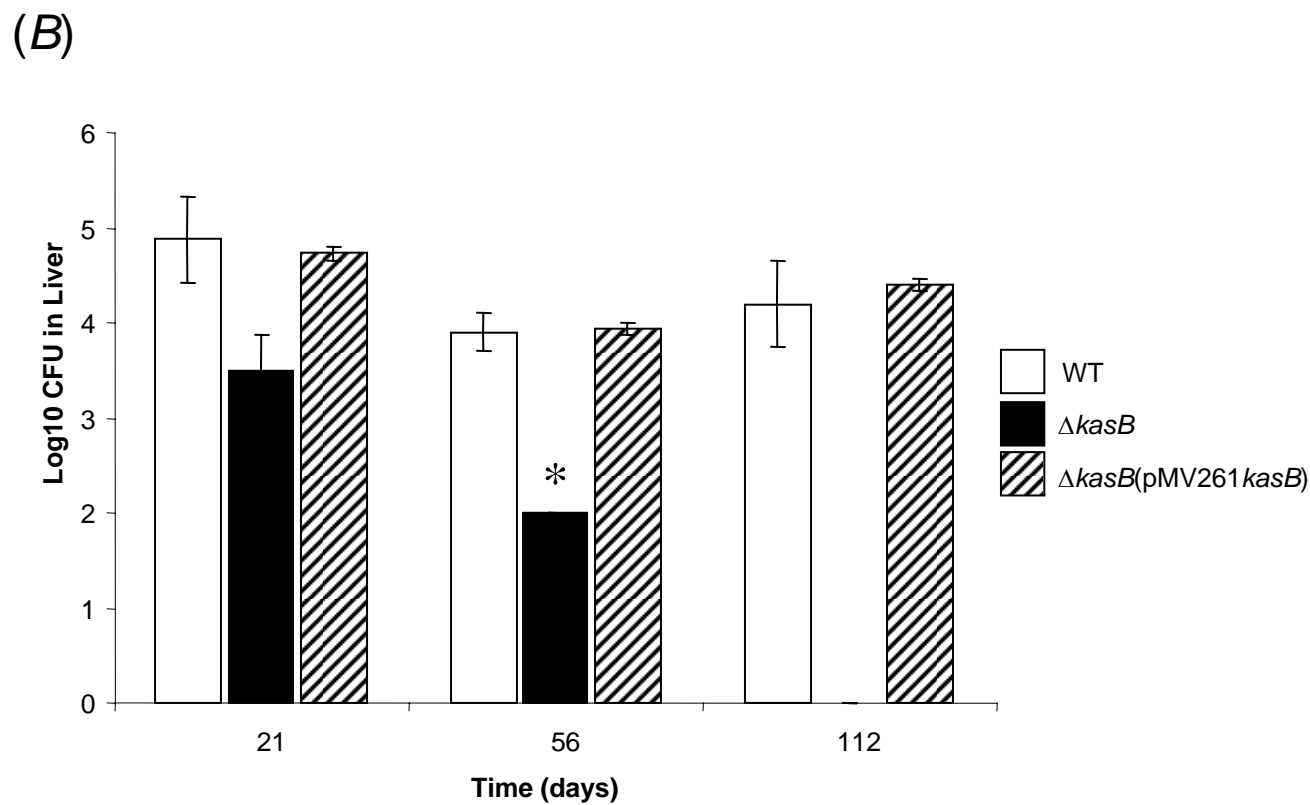

Supplement: pnas_0608654104_8.pdf [file pnas_0608654104_8.pdf]

(A)

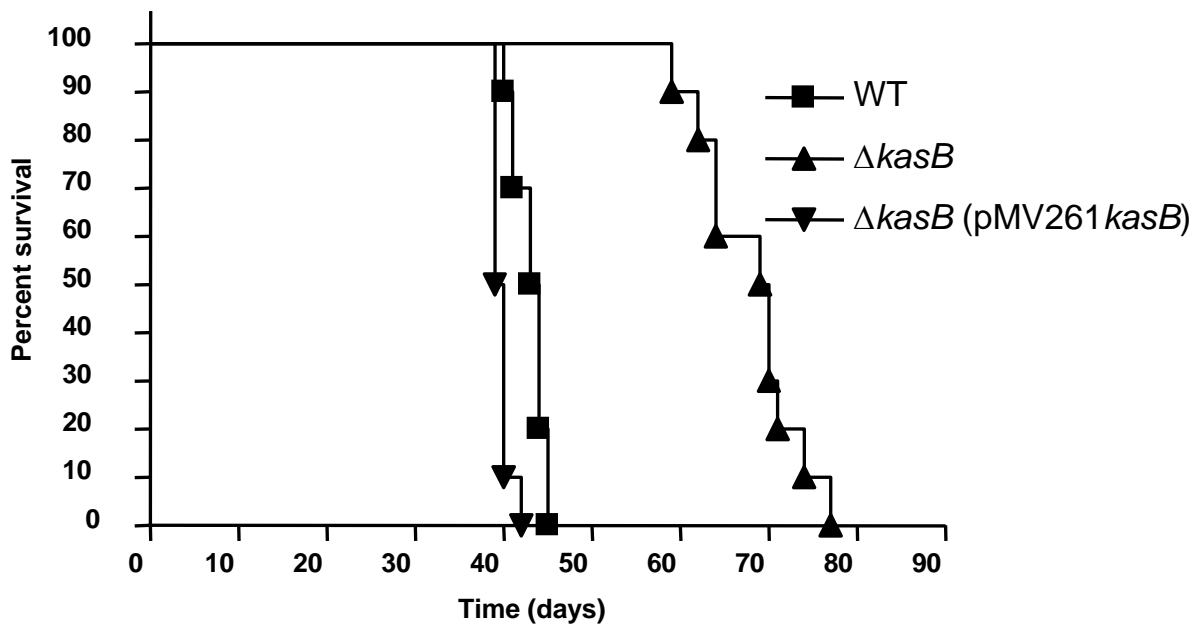

(B)

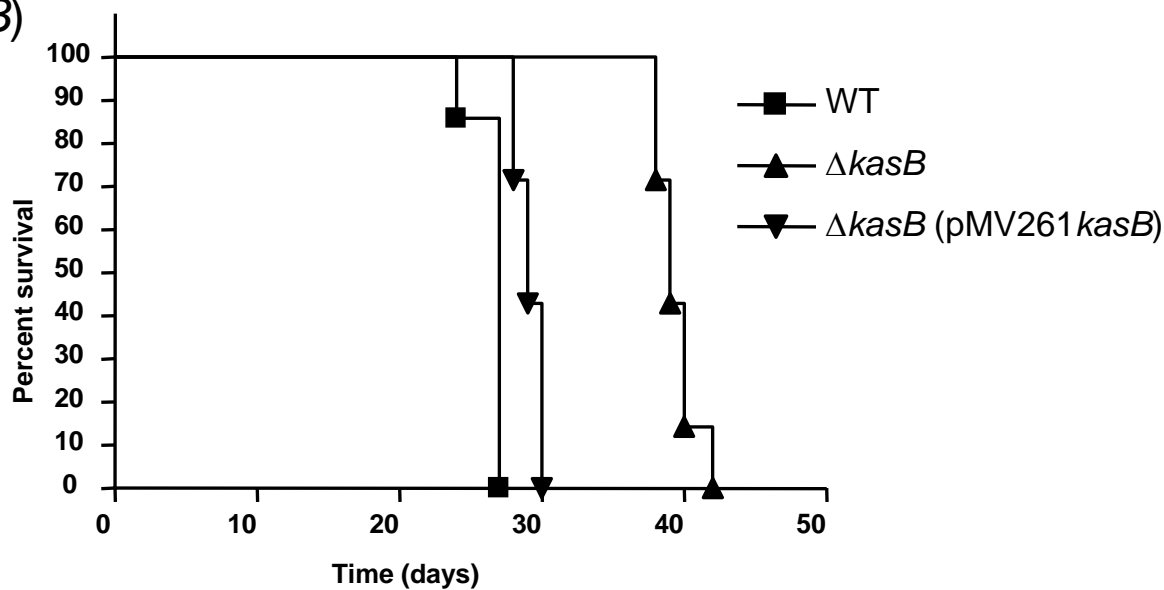

Supplement: pnas_0608654104_9.pdf [file pnas_0608654104_9.pdf]
